# Supplementary material for: Integrated Management of Childhood Illnesses (IMCI): a mixed-methods study on implementation, knowledge and resource availability in Malawi
Source: PubMed Central journal article supplement (PMC8098945; doi:10.1136/bmjpo-2021-001044), 2021-04-30
Supplement: bmjpo-2021-001044supp001.pdf [file bmjpo-2021-001044supp001.pdf]

**Appendix 1: Summary of healthcare worker cadres and their role**

| Qualification                  | Definition                                                                                                                                                                                                                                                                            |
|--------------------------------|---------------------------------------------------------------------------------------------------------------------------------------------------------------------------------------------------------------------------------------------------------------------------------------|
| Health Surveillance Assistants | Community level workers with 6 weeks of initial health pre-service training. Generally, provide health promotion and preventive health care through door to door or outreach clinics. Diagnose and treat some illness as part of iCCM in more remote/underserved areas <sup>1</sup> . |
| Hospital Attendant             | Workers who perform routine patient personal care as directed by more senior health personnel. It includes orderlies and nursing aides <sup>2</sup> .                                                                                                                                 |
| Medical Assistants             | Two years of clinical training <sup>1</sup> to gain a certificate in clinical medicine. Perform clinical duties (except for surgical procedures) <sup>3</sup> .                                                                                                                       |
| Clinical Officer               | Mid-level practitioners who receive 3-4 years of training and often manage health facilities and fill the role of doctors due to workforce shortages <sup>1,4</sup>                                                                                                                   |

1. Makwero M. Delivery of primary health care in Malawi. *African Journal of Primary Health Care & Family Medicine*. 2018;10(1)
2. Malawi Health Workforce Observatory. *Human Resources for Health Country Profile Malawi*,. 2010.
3. Muula A. Case for Clinical Officers and Medical Assistants in Malawi. *Croatian Medical Journal*. 2009;50(1):77-78.
4. Jiskoot P. On-the-job training of clinical officers in Malawi. *Malawi Medical Journal*. 2008;20(3):74-77.

## Appendix 2: Healthcare worker focus group discussion topic guide

### 1. Current IMCI

- When did you last have IMCI training? Can you describe the training?
- Can you describe what IMCI is?
- Do you think you implement IMCI in your setting?
- Are there any barriers you face in implementing IMCI?
- Are there any benefits you think of implementing IMCI?

### 2. Current emergency treatment

- Can you give a recent example of child you saw, that you would describe as an emergency?
  - o Probe: do others recognise this example, ask for multiple different ones, you can give an example
- Can you describe what you did with this child?
  - o Probe: would everyone do the same, what would they do different
- What would you have liked to do in this situation?
- How did you feel about your management of this case?
- How often do you see children like this?
- Do you use any tools or algorithms (guidelines) when assessing emergency cases?
- When managing emergency cases, how do you work? Is it alone, or in a team? Who is part of the team?

### 3. Current referral procedure

- How often do you refer a child to the hospital? For example, this week how many children has everyone referred?
- Can you describe the process of referral?
  - o Probe: documentation, explaining to the caregiver, organising transport
- Do all caregivers complete the referral?
- Are there any barriers you face in referring children?
- Are there any benefits to referring children?

### 4. ETAT awareness

- How do you decide which order to see patients in your clinic?
- Have you heard of ETAT? Can you describe ETAT?
- Have you ever had training in ETAT? What about other types of triaging?

### 5. ETAT preparedness

- What steps would need to happen for you implement ETAT?
- Do you have the equipment you need? Can you give examples?
- Do you have the staff you need?
- Are there any barriers to implementing ETAT? And barriers to adequate management of severely ill children?
- Are there any benefits to implementing ETAT in your setting?

**Appendix 3: Summary of healthcare worker IMCI knowledge scores, with 10 being the maximum score**

**Appendix 4: Healthcare provider IMCI training and knowledge survey**

|                                                                                                                                                                                    |                                                                                                                                                                                                        |                        |
|------------------------------------------------------------------------------------------------------------------------------------------------------------------------------------|--------------------------------------------------------------------------------------------------------------------------------------------------------------------------------------------------------|------------------------|
| 1.1 Have you ever had IMCI training?                                                                                                                                               | Yes / No                                                                                                                                                                                               | If YES, go to 1.4      |
| 1.2 Have you ever been given an orientation or briefing on IMCI?                                                                                                                   | Yes / No                                                                                                                                                                                               | If NO, go to 1.9       |
| 1.3 Who gave you this orientation/ briefing?                                                                                                                                       | 1. Facility in-charge<br>2. Other facility staff<br>3. DHMT representative<br>4. Other                                                                                                                 | Go to 1.9              |
| 1.4 When was your first training?                                                                                                                                                  | _____ year                                                                                                                                                                                             |                        |
| 1.5 Who provided this first training?                                                                                                                                              | 1. MoH/DHMT<br>2. NGO<br>3. Research project<br>4. During school/training<br>5. Other                                                                                                                  |                        |
| 1.6 Have you had a refresher training or active mentorship since?                                                                                                                  | Y / N                                                                                                                                                                                                  | If NO, go to 1.9       |
| 1.7 When was the refresher?                                                                                                                                                        | _____ year                                                                                                                                                                                             |                        |
| 1.8 Who provided this refresher training?                                                                                                                                          | 1. MoH / DHTM<br>2. NGO<br>3. Research project<br>4. During school/training<br>5. Other                                                                                                                | Select all that apply  |
| 1.9 What is a child's classification if he is 10 months old, has had a cough that lasted two days, has a breathing rate of 46 breaths per minute and chest indrawing? <sup>1</sup> | 1. Cough or cold<br>2. Pneumonia<br>3. Severe pneumonia<br>4. Very severe febrile disease<br>5. Don't know                                                                                             | Select one             |
| 1.10 What are the four main symptoms for which every sick child should be checked?                                                                                                 | 1. Malnutrition, cough, vitamin A, ear problems<br>2. Anemia, fever, diarrhea, ear problem<br>3. Cough, diarrhea, malnutrition, ear problem<br>4. Cough, diarrhea, fever, ear problem<br>5. Don't know | Select the best answer |
| 1.11 For each of the following cases, select <b>Yes</b> if urgent referral is needed or select <b>No</b> if urgent referral is not needed.                                         |                                                                                                                                                                                                        |                        |
| 1.11a A 6-month-old boy does not have general danger signs. He is classified with: MASTOIDITIS and NO ANEMIA AND NOT VERY LOW WEIGHT                                               | 1. Yes<br>2. No<br>3. Don't know                                                                                                                                                                       |                        |
| 1.11b A 7-month-old girl does not have general danger signs. She is classified with: COUGH and DIARRHEA                                                                            | 1. Yes<br>2. No<br>3. Don't know                                                                                                                                                                       |                        |

|                                                                                                                                             |                                                                                                                                                                                                                                                                                                                                                        |                           |
|---------------------------------------------------------------------------------------------------------------------------------------------|--------------------------------------------------------------------------------------------------------------------------------------------------------------------------------------------------------------------------------------------------------------------------------------------------------------------------------------------------------|---------------------------|
| 1.11c A 9-month-old boy is lethargic. He is classified with: DIARRHEA and WITH SEVERE DEHYDRATION                                           | <ol style="list-style-type: none"> <li>1. Yes</li> <li>2. No</li> <li>3. Don't know</li> </ol>                                                                                                                                                                                                                                                         |                           |
| 1.11d A 2-year-old girl does not have general danger signs. She is classified with: DIARRHEA and SEVERE DEHYDRATION and SEVERE MALNUTRITION | <ol style="list-style-type: none"> <li>1. Yes</li> <li>2. No</li> <li>3. Don't know</li> </ol>                                                                                                                                                                                                                                                         |                           |
| 1.12 If a child has any of the four general danger signs, you should urgently refer him to hospital for treatment, These signs are:         | <ol style="list-style-type: none"> <li>1. Unable to drink/feed</li> <li>2. Severe cough</li> <li>3. Convulsions</li> <li>4. Vomiting everything</li> <li>5. Lethargy / unconsciousness</li> <li>6. Bloody stools</li> <li>7. Don't know</li> </ol>                                                                                                     | Select four from the list |
| 1.13 According to IMCI, a mother of a sick child should be counselled about what topics:                                                    | <ol style="list-style-type: none"> <li>1. Importance of fluids and feeding</li> <li>2. When to return to the clinic immediately</li> <li>3. Her own health</li> <li>4. Immunisation</li> <li>5. When to return for a follow-up visit</li> <li>6. The treatments being given to the child</li> <li>7. Family planning</li> <li>8. Don't know</li> </ol> | Select all that apply     |
| 1.14 What are two signs that are used to classify severe malnutrition                                                                       | <ol style="list-style-type: none"> <li>1. Small arm circumference</li> <li>2. Visible severe wasting</li> <li>3. Oedema of both feet</li> <li>4. Severe dehydration</li> <li>5. Don't know</li> </ol>                                                                                                                                                  | Select two from the list  |
| 1.15 To classify the dehydration status of a child with diarrhoea you will look:                                                            | <ol style="list-style-type: none"> <li>1. At the general condition</li> <li>2. For sunken eyes</li> <li>3. For oedema of both feet</li> <li>4. If the child is drinking eagerly</li> <li>5. For palmar pallor</li> <li>6. For a swollen abdomen</li> <li>7. Don't know</li> </ol>                                                                      | Select all that apply     |
